# Supplementary material for: Otolith Analyses Highlight Morpho-Functional Differences of Three Species of Mullet (Mugilidae) from Transitional Water
Source: MDPI journal article supplement (doi:10.3390/su14010398), 2021-12-31

**Supplementary Figure S1.** Representative stereomicroscope pictures of left Sagittal otoliths of *Chelon auratus* examined in the study. Scale bar: 3mm.

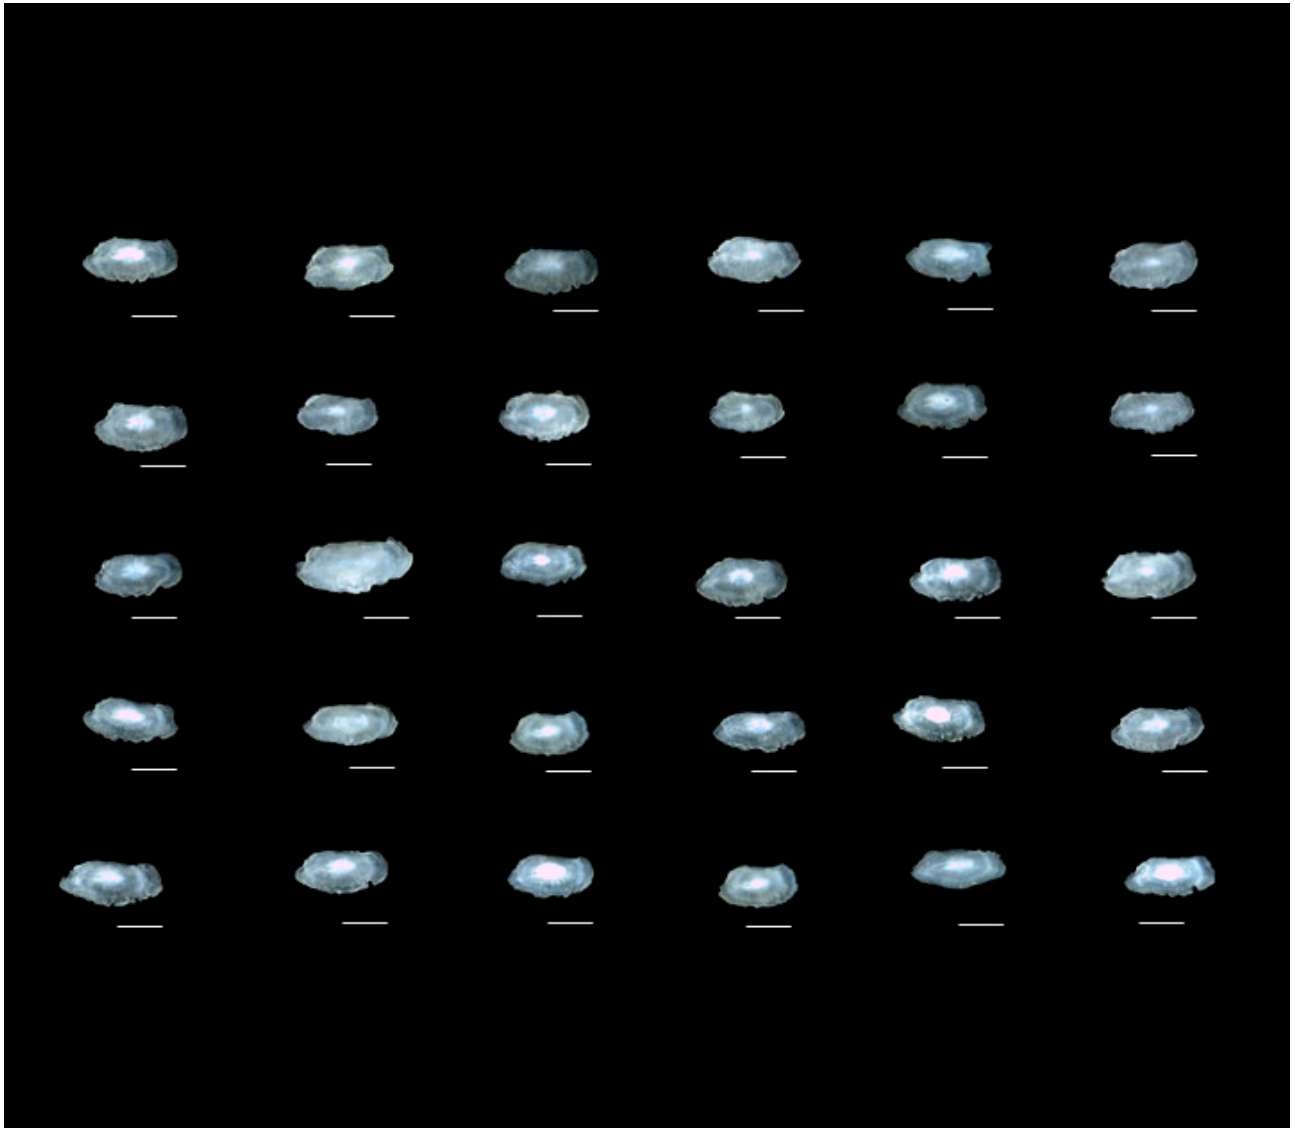

Supplement: s1 [file s1]
