# Supplementary material for: Otolith Analyses Highlight Morpho-Functional Differences of Three Species of Mullet (Mugilidae) from Transitional Water
Source: MDPI journal article supplement (doi:10.3390/su14010398), 2021-12-31
Supplement: s1 [file s1]

**Supplementary Table S4.** Chemical parameter of Ganzirri lagoon during the sampling periods.

| <b>01-03-21</b>               |        |
|-------------------------------|--------|
| <b>pH</b>                     | 7,875  |
| <b>Temperatura aria (°C)</b>  | 13     |
| <b>Temperatura acqua (°C)</b> | 15,95  |
| <b>Salinità (psu)</b>         | 29,14  |
| <b>O<sub>2</sub> (mg/l)</b>   | 10,17  |
| <b>O<sub>2</sub> (%sat)</b>   | 115,45 |
| <b>01-06-21</b>               |        |
| <b>pH</b>                     | 8,13   |
| <b>Temperatura aria (°C)</b>  | 25     |
| <b>Temperatura acqua (°C)</b> | 28,4   |
| <b>Salinità (psu)</b>         | 31,99  |
| <b>O<sub>2</sub> (mg/l)</b>   | 8,77   |
| <b>O<sub>2</sub> (%sat)</b>   | 129,65 |
