# Supplementary material for: Otolith Analyses Highlight Morpho-Functional Differences of Three Species of Mullet (Mugilidae) from Transitional Water
Source: MDPI journal article supplement (doi:10.3390/su14010398), 2021-12-31
Supplement: s1 [file s1]

Archive with 4 entries (4 files):
- S1.pdf
- S2.pdf
- S3.pdf
- S4.pdf
